# Supplementary material
Source: ML conference proceedings conference paper supplement (https://proceedings.neurips.cc/paper_files/paper/2008/hash/c058f544c737782deacefa532d9add4c-Abstract.html)

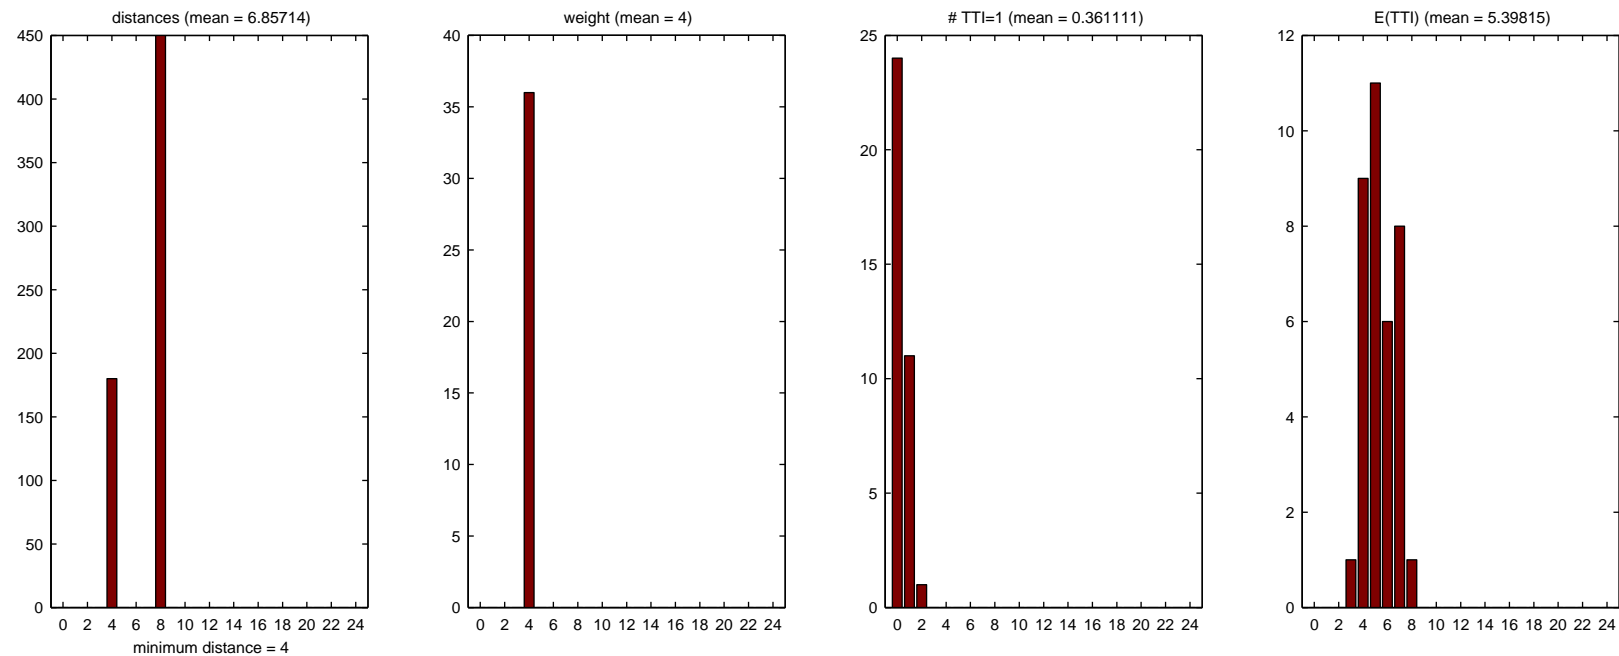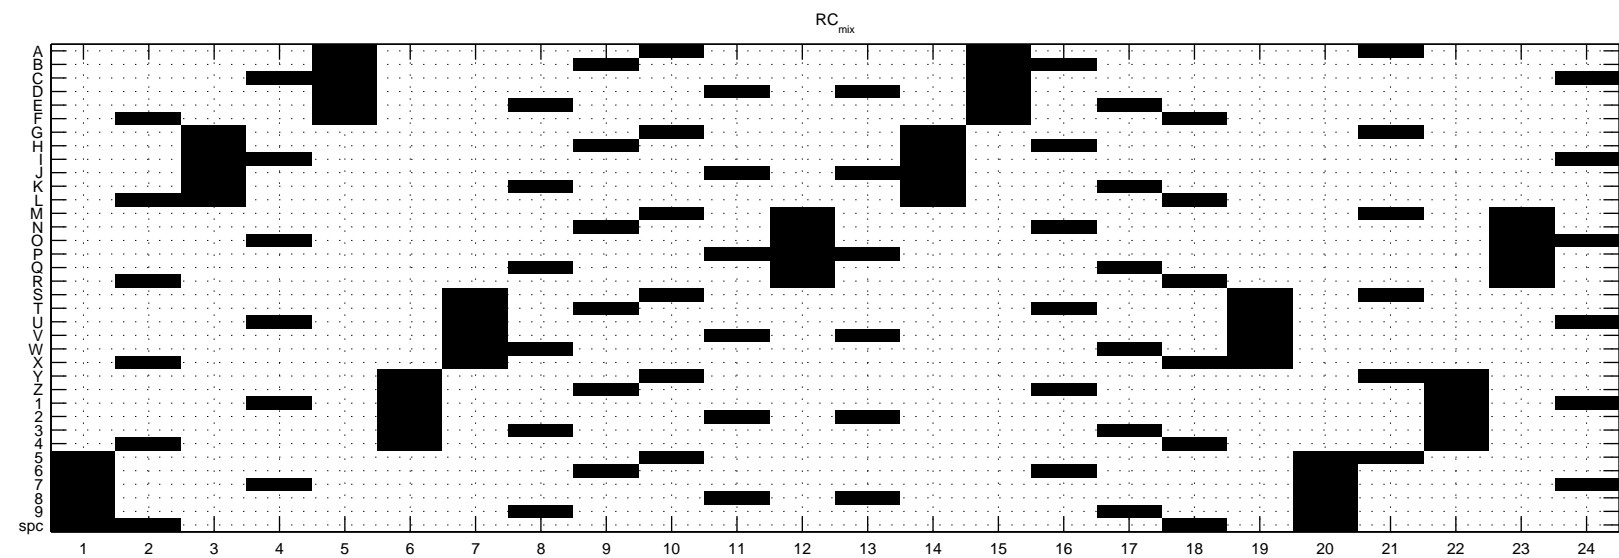

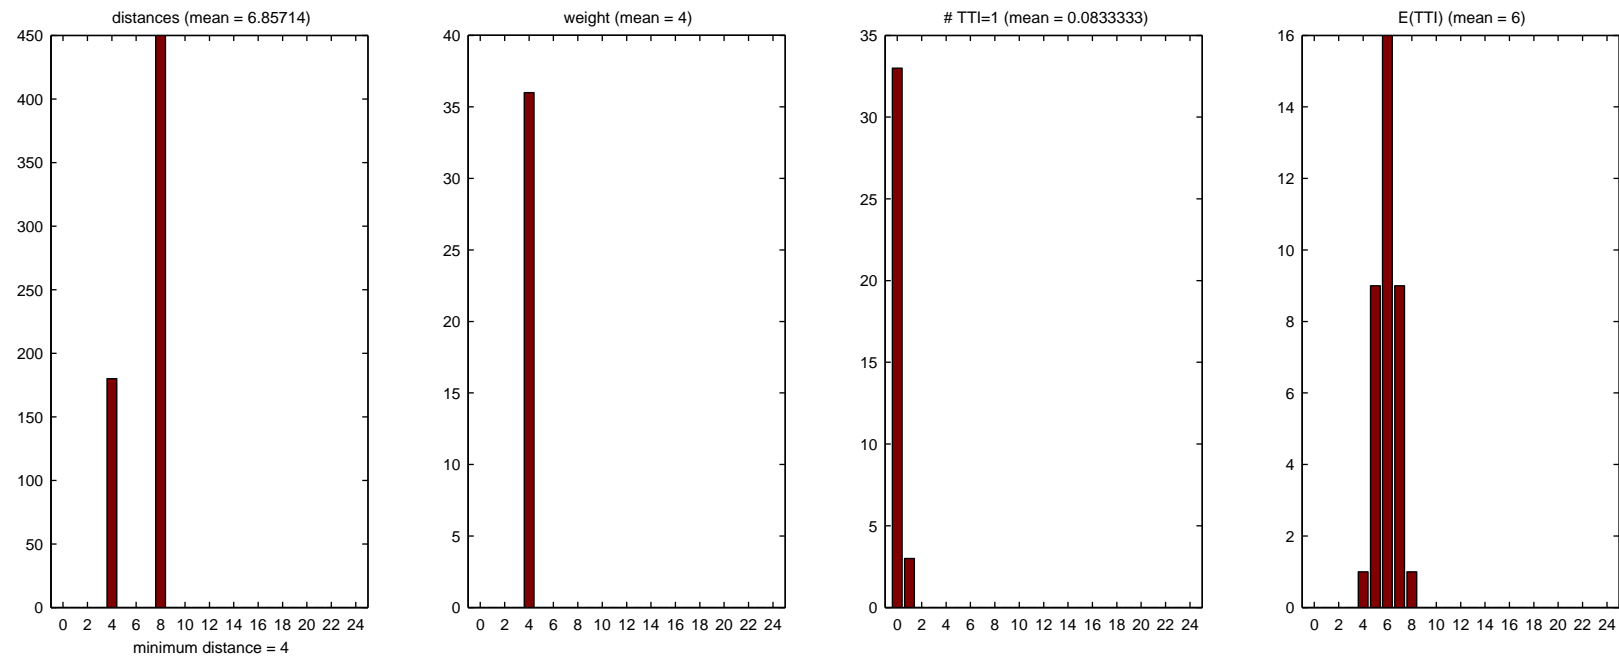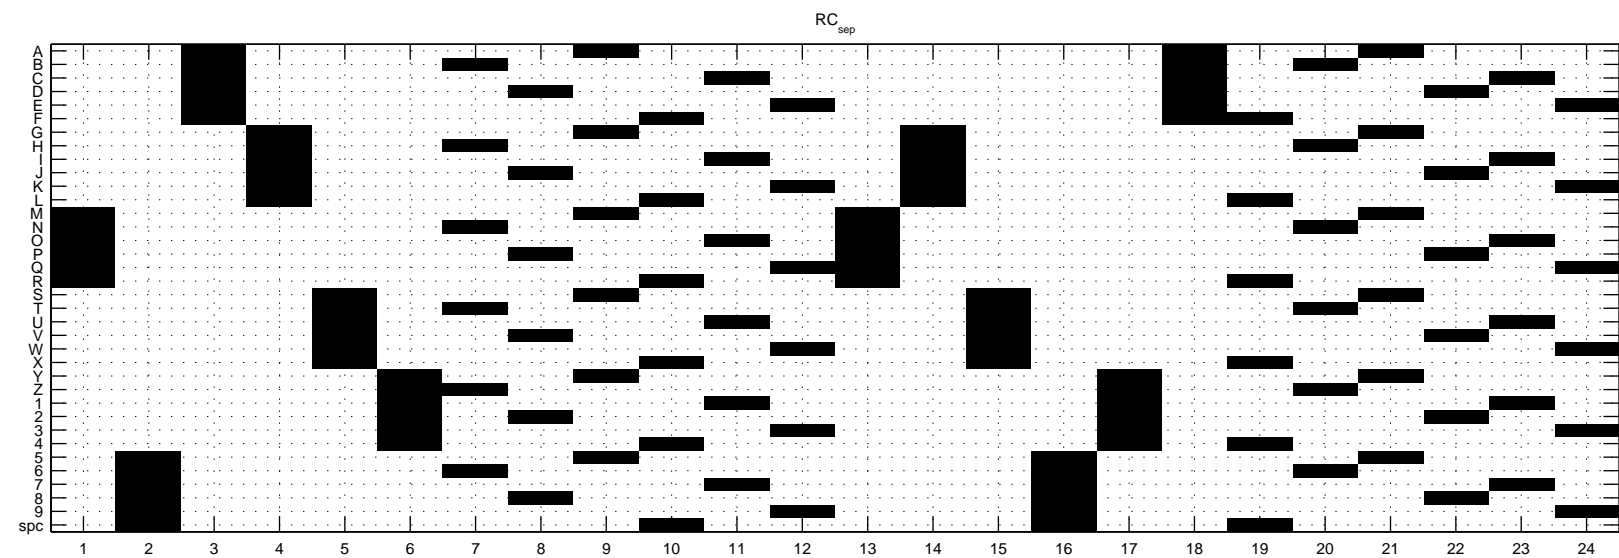

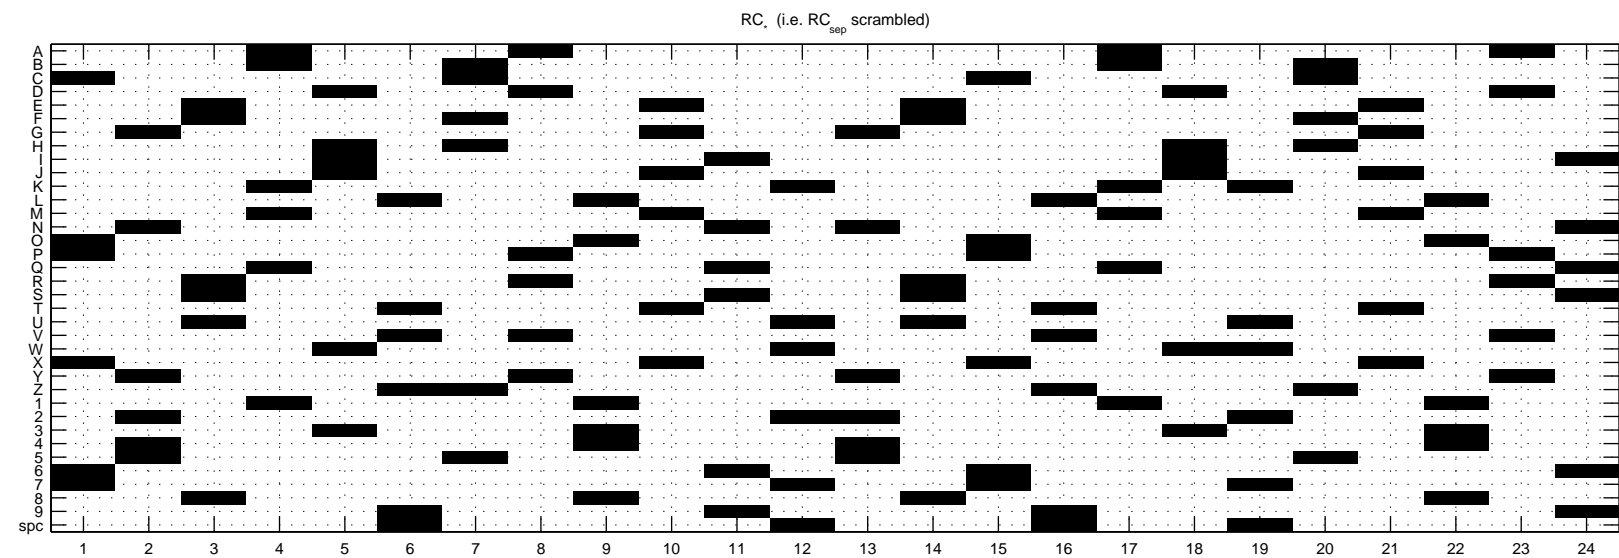

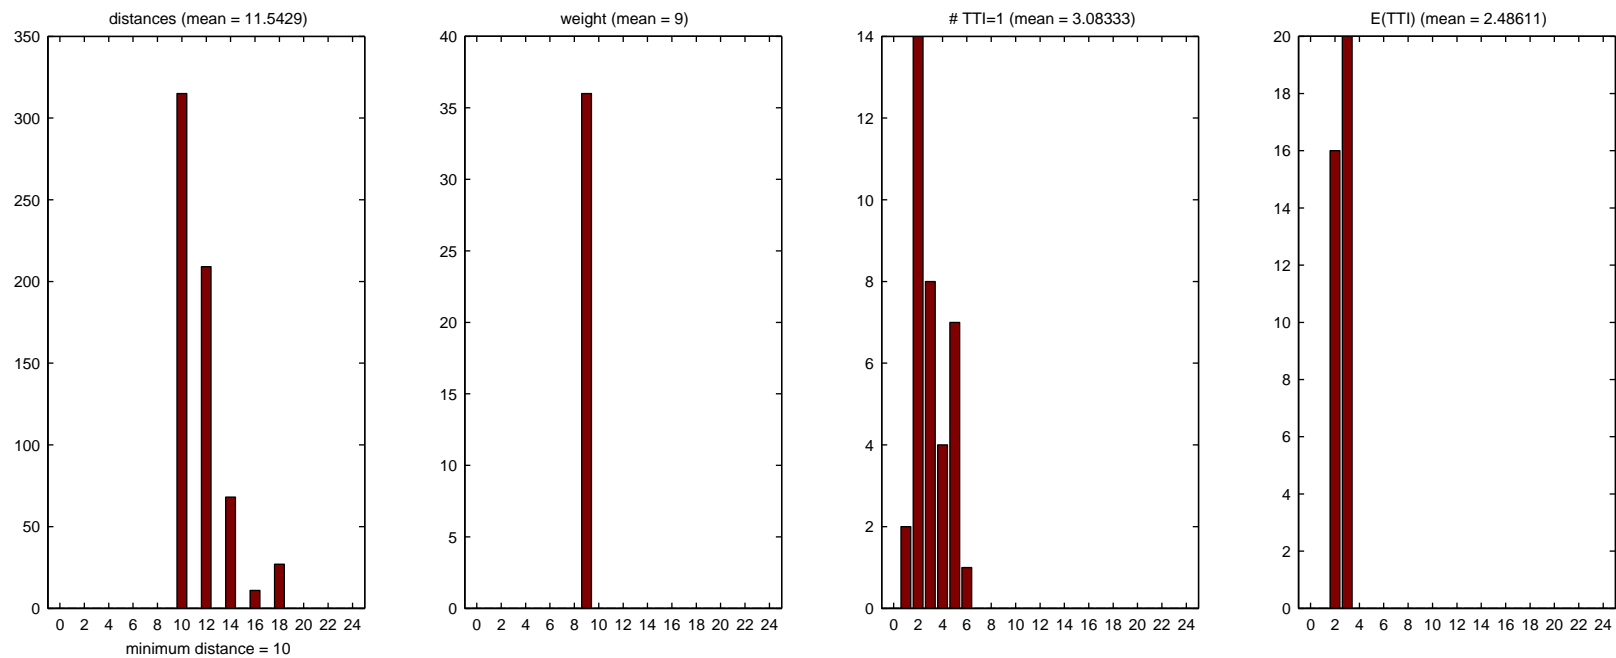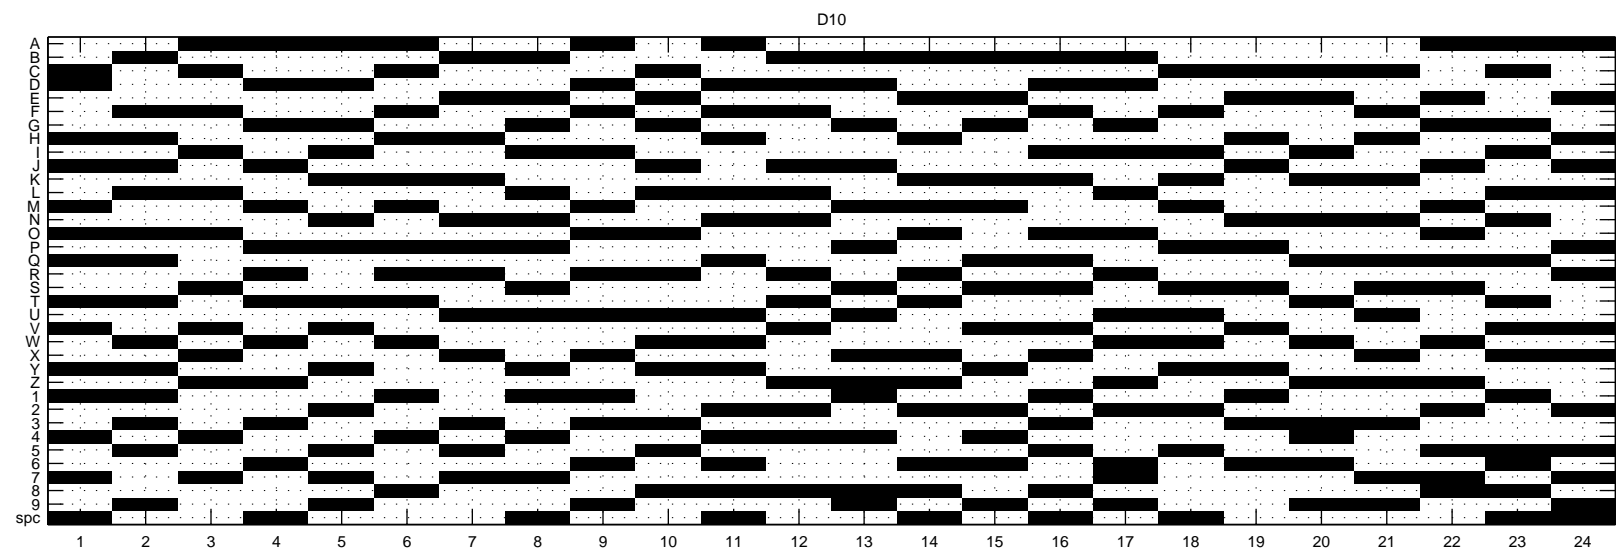

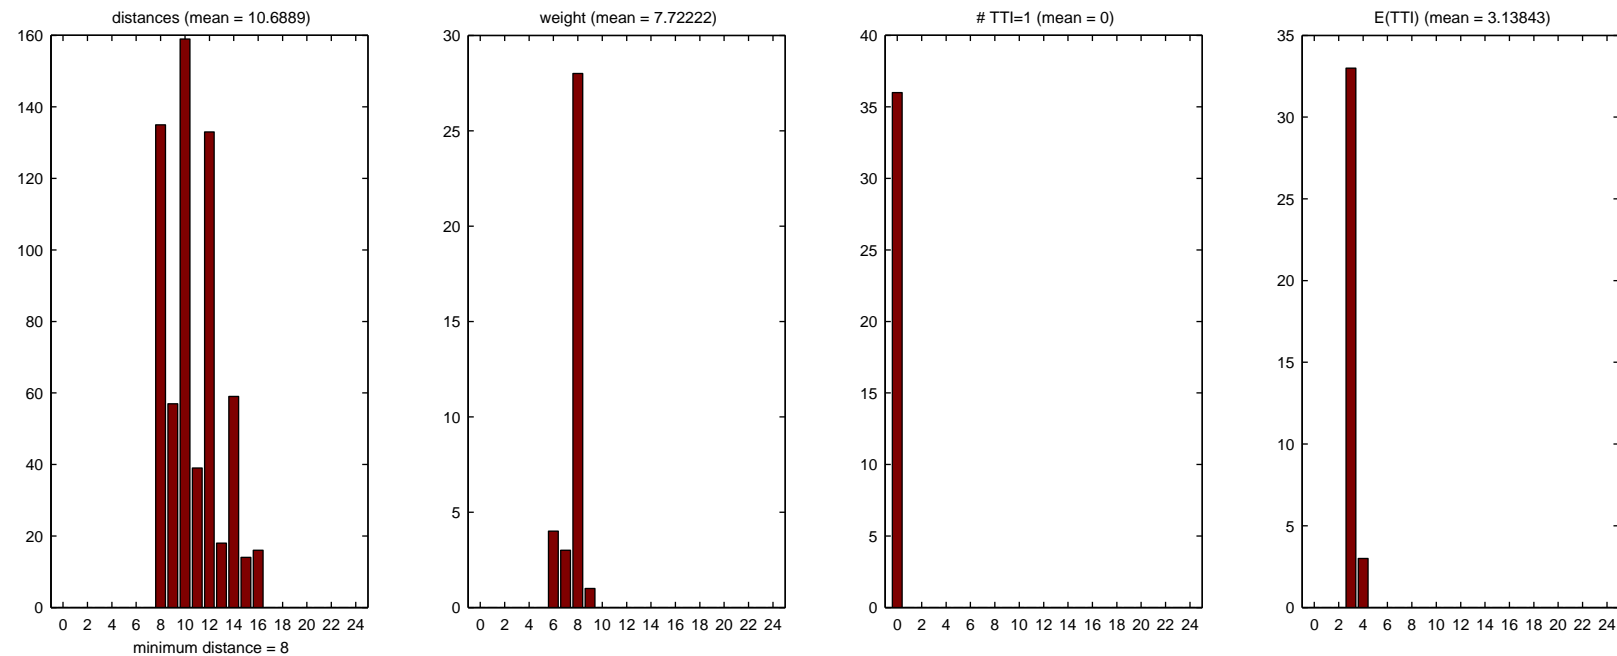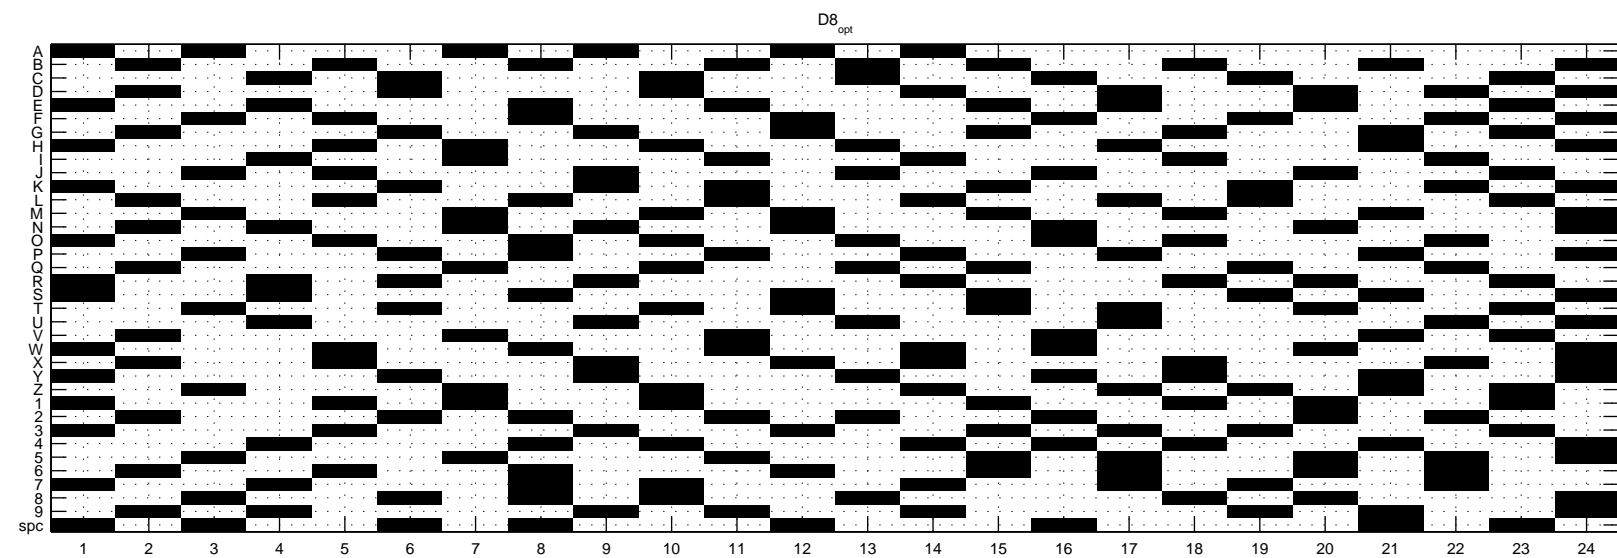

Supplement: Supplementary file [file c058f544c737782deacefa532d9add4c-Supplemental.zip]
